# Supplementary material
Source: publisher site journal article supplement (https://spandidos-publications.com/2258/downloadSupplementary)

Figure S1. The methylation level of the miR-29b-3p gene promoter region in pancreatic cancer tissues is increased.

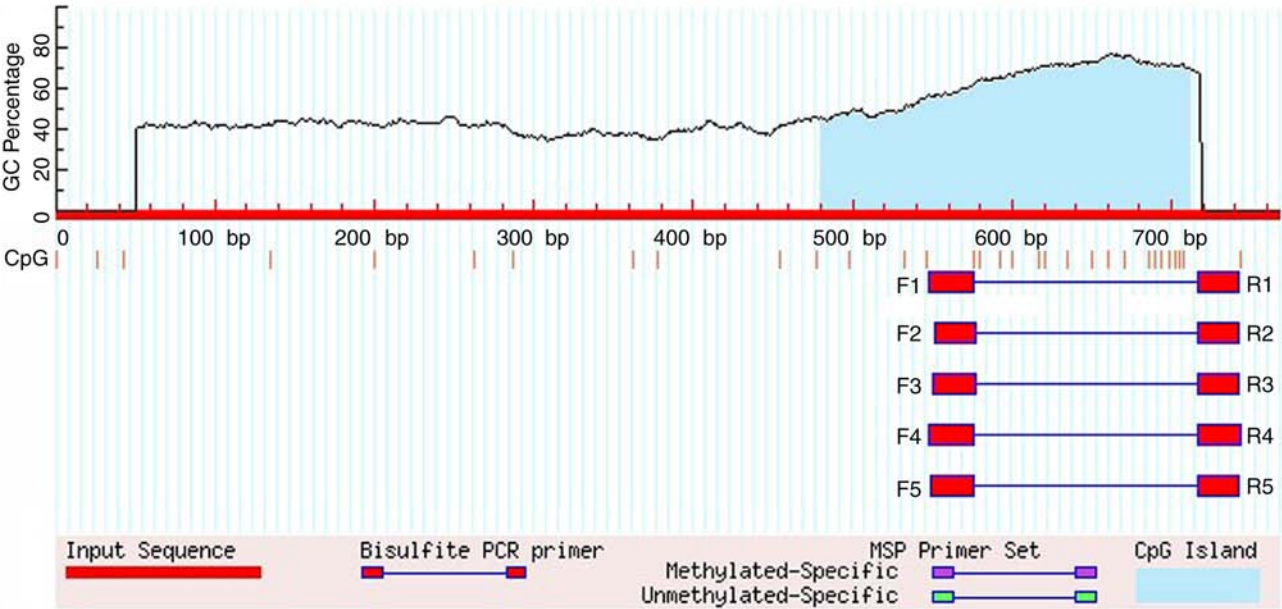

Supplement: Supplementary file 1 [file downloadSupplementary]
